# Supplementary material
Source: PubMed Central journal article supplement (PMC6972055)
Supplement: 41997_2015_10607045_MOESM1_ESM.pdf [file 41997_2015_10607045_MOESM1_ESM.pdf]

# La maltraitance envers les enfants chez les familles immigrantes et réfugiées: revue systématique de la littérature

Annie LeBrun, B.Sc.,<sup>1</sup> Ghayda Hassan, PhD,<sup>1</sup> Mylène Boivin, PhD,<sup>1</sup> Sarah-Louise Fraser, PhD,<sup>2</sup> Sarah Dufour, PhD,<sup>2</sup> Chantal Lavergne, PhD<sup>3</sup>

## RÉSUMÉ

**OBJECTIFS:** Les résultats des études portant sur la maltraitance des enfants issus du groupe majoritaire ne peuvent être extrapolés systématiquement aux familles immigrantes et réfugiées, étant donné les caractéristiques et besoins spécifiques de ces populations. Les buts de cet article sont: 1) de réaliser une recension systématique des écrits sur la prévalence et les facteurs de risque et de protection en ce qui a trait à la maltraitance des enfants issus de familles immigrantes et réfugiées, et 2) d'intégrer les résultats dans un modèle écosystémique qui pourra guider les recherches futures.

**MÉTHODE:** Un processus en quatorze étapes, inspiré des principes *Preferred Reporting Items for Systematic Reviews and Meta-Analyses* (PRISMA) ainsi que de la Collaboration canadienne pour la santé des immigrants et des réfugiés (CCIHR), a guidé le processus de revue de littérature. Les principales bases de données ont été consultées « de la date la plus ancienne jusqu'en juillet 2014 ». Les critères de sélection des articles incluaient : avoir une méthodologie qualitative ou quantitative, être écrit en français ou anglais ainsi que décrire, évaluer ou réviser la prévalence et les facteurs de risque et de protection pour les mauvais traitements chez les familles immigrantes et/ou réfugiées.

**SYNTHÈSE:** Les résultats des 24 articles rencontrant les critères d'éligibilité suggèrent que les enfants immigrants ou réfugiés ne sont pas plus à risque de maltraitance. Toutefois, les immigrants récents et les réfugiés font face à des facteurs de risque spécifiques étant donné leur statut au pays d'accueil et les défis propres à l'intégration dans un nouveau pays.

**CONCLUSION:** Les recherches futures doivent inclure davantage de participants immigrants et réfugiés dans leurs échantillons, ainsi que doivent examiner les interactions entre les facteurs liés à la migration et à la culture en ce qui concerne la prévalence et les conséquences de la maltraitance chez les enfants ainsi que le traitement pour ces populations.

**MOTS CLÉS:** Recension, Maltraitance, Immigrants, Réfugiés, Facteurs de risque, Modèle écosystémique.

*Can J Public Health* 2015;106(7)(Suppl. 2):eS45-eS57  
doi : 10.17269/CJPH.106.4838

La maltraitance envers les enfants est un problème de santé publique mondiale associé à de nombreuses conséquences graves. Ces conséquences ont des effets à court et à long-terme sur la santé et le développement des enfants<sup>1,2</sup> et s'accompagnent d'importants coûts socioéconomiques.<sup>1</sup> La maltraitance envers les enfants inclut la négligence parentale, l'abus physique, sexuel ou psychologique ainsi que l'exposition à la violence conjugale.

Les deux dernières décennies ont été marquées par une attention grandissante aux aspects ethniques et culturels dans la problématique de la maltraitance envers les enfants. Plusieurs études utilisant des méthodologies avec des participants issus de groupes ethniques minoritaires se sont révélées cruciales et très pertinentes à la collecte d'informations pour la promotion de pratiques plus adaptées aux réalités multiculturelles. Cependant, l'extrapolation de ces résultats à l'ensemble des familles immigrantes et réfugiées (de première et de deuxième génération) est non seulement inappropriée mais également inéquitable puisque que ces résultats ne prennent pas en compte les caractéristiques et les besoins spécifiques de ces groupes (par exemple, les conditions migratoires et les conditions d'établissement).<sup>2,3</sup> Bien que plusieurs pays occidentaux, notamment les États-Unis et le Canada, aient une longue histoire de migration et de diversité culturelle et sociale, les institutions de santé devront continuer à s'adapter aux mouvements populationnels rapides.<sup>4</sup> La majorité des immigrants s'établissant au Canada n'est plus issue des pays d'Europe et proviennent de plus en plus de pays en développement déchirés par des guerres et qui sont ravagés par des conflits politiques. Plusieurs de ces pays sont également aux prises avec des problèmes sociaux ou économiques sévères.<sup>4</sup> Bien que ces nouvelles familles partagent plusieurs caractéristiques avec les membres de la diaspora établie, elles font également face à des défis spécifiques. Ces défis doivent être examinés puisqu'ils pourraient influencer le risque de

maltraitance à l'égard des enfants ainsi que l'accès et l'utilisation de services de soins de santé dans les populations immigrantes et réfugiées.<sup>3</sup> Une revue systématique de la littérature portant sur la prévalence, le dépistage et le traitement de la maltraitance des enfants chez les immigrants et les réfugiés installés récemment au Canada a été publiée en 2011 par Hassan, Pottie et le CCIHR (Canadian Collaboration for Immigrant and Refugee Health).<sup>2</sup> Le comité a recommandé contre «le dépistage systématique et ce, en raison de la mauvaise performance des instruments de dépistage et des effets potentiellement néfastes causés par les taux très élevés de faux positifs.» (p.2) Le comité a également conclu qu'un programme de visites à domicile s'étalant sur les deux premières années au pays devrait être offert aux mères immigrantes et réfugiées exposées à plusieurs facteurs de risque. Aucune revue systématique portant sur les facteurs de risque ou de protection pour la maltraitance des enfants au sein des populations immigrantes et réfugiées n'a toutefois encore été menée.

## Affiliation des auteurs

1. Département de Psychologie, Université du Québec à Montréal, Montréal, QC

2. Département de Psychoéducation, Université de Montréal, Montréal, QC

3. Centre jeunesse de Montréal-Institut Universitaire, Montréal, QC

**Correspondance :** Annie LeBrun, Département de psychologie, Université du Québec à Montréal, C.P 8888 succursale Centre-Ville, Montréal, QC, H3C 3P8, Courriel : lebrun.annie.2@courrier.uqam.ca.

**Source de fonds :** Ce travail a été supporté par le Fonds de recherche du Québec – Société et Culture (FRQSC), CSSS de la Montagne – Migration et ethnicité dans les interventions en santé et en services sociaux (MÉTIS), Groupe de recherche et d'action sur la victimisation des enfants (GRAVE) et Centre jeunesse de Montréal-Institut universitaire (CJM-IU). Les auteures remercient également Marie-Ève Clément et Jacques Moreau pour la révision et les commentaires.

**Conflit d'intérêts :** Aucun à déclarer.

L'objectif principal de cette revue systématique est donc double: 1) examiner l'état de la littérature sur la prévalence, les facteurs de risque et de protection concernant la maltraitance des enfants au sein des populations immigrantes et réfugiées et 2) intégrer ces résultats dans un cadre analytique écosystémique qui orientera les recommandations de recherches futures. Pour atteindre ces objectifs, cette revue de littérature est guidée par trois questions clés: 1) Les enfants immigrants ou réfugiés sont-ils plus à risque de subir de la maltraitance? ; 2) Quels sont les facteurs de risque et de protection spécifiques aux immigrants et réfugiés relatifs à la maltraitance envers les enfants dans le cadre conceptuel écosystémique? et 3) Quelles sont les recommandations pour les recherches futures?

MÉTHODE

Afin de répondre à chacune des questions mentionnées précédemment, nous avons suivi les quatorze étapes standardisées développées par le CCIRH<sup>5</sup> qui ont été elles-mêmes inspirées de l'instrument AGREE (Appraisal of Guidelines Research & Evaluation).<sup>6</sup> L'AGREE bénéficie d'une reconnaissance internationale quant au développement de lignes directrices basées sur les données probantes.<sup>5</sup> Nous avons déjà utilisé ces deux guides méthodologiques dans le cadre de revues systématiques publiées dans le passé.<sup>1-3,7-9</sup> Les 14 étapes utilisées sont également conformes aux recommandations émises par PRISMA relativement aux examens systématiques de la littérature et aux méta-analyses.<sup>10</sup>

Nous avons d'abord identifié le rationnel sous-jacent à la présente revue de littérature. Tout en s'inscrivant dans le modèle conceptuel écologique, nous avons identifié les trois questions PICO (Population, Intervention, Comparaison, Outcome)<sup>5</sup> qui orientent la présente démarche (voir les questions clés 1 à 3 du présent article). Nous avons ensuite élaboré la stratégie de recherche ainsi que les critères utilisés pour évaluer l'admissibilité des documents existants (voir tableau 1). De ce fait, nous avons également relevé les statistiques spécifiques aux populations immigrantes et réfugiées. Les documents sélectionnés devaient utiliser un échantillon composé d'immigrants. Les participants devaient pouvoir correspondre à l'une des définitions suivantes : a) un immigrant est un adulte d'origine étrangère qui est installé dans un nouveau pays hôte; b) un enfant/adolescent immigrant est soit un enfant né à l'étranger vivant maintenant dans un pays hôte (immigrant de première génération) ou un enfant né dans le pays hôte de parents immigrés (immigrant de seconde génération); c) un réfugié se définit comme une personne (adulte ou enfant) née à l'étranger et résidant dans le pays hôte en vertu d'une demande de refuge (nous incluons sous le terme réfugié, les personnes qui peuvent être

des demandeurs d'asile ou sans-papiers). Le tableau 1 présente les résultats des recherches bibliographiques et les critères d'inclusion.

Plusieurs bases de données (PsycINFO, MEDLINE, ERIC, Social Services Abstracts, Famili@) ont été consultées, «de la date la plus ancienne à juillet 2014.» La stratégie de recherche a été créée selon les paramètres de la base de données PsycINFO, puis adaptée à la structure spécifique de chaque base de données. Les différentes combinaisons de mots clés suivants ont été utilisées (avec les synonymes et les troncatures pertinentes): «maltraitance envers les enfants OU abus d'enfants OU protection de l'enfance OU négligence des enfants OU abus psychologique OU violence domestique OU abus physique OU violence verbale», «prévention OU traitement OU intervention», «immigrants OU réfugiés OU minorités raciales et ethniques OU groupes raciaux et ethniques», «facteurs de risque OU facteurs de protection». La recherche a été complétée en consultant des sites Web ainsi que la liste de références de tous les articles jugés pertinents. Ceci a été fait dans le but d'identifier les articles pertinents qui n'auraient pas été relevés par la stratégie de recherche initiale. Les mots clés «minorités raciales et ethniques OU groupes raciaux et ethniques » et «prévention OU traitement OU intervention» ont été inclus dans la recherche initiale afin de s'assurer que la recension couvrait la quasi-totalité de la littérature existante sur le sujet. Cependant, seules les données relatives aux populations immigrantes et aux réfugiés ont finalement été sélectionnées.

La première sélection a été effectuée séparément par deux réviseuses qui sélectionnaient les articles sur la base de leur titre et de leur résumé. Dans la deuxième phase de sélection, les deux réviseuses ont procédé à une lecture intégrale de chaque texte. Les désaccords relatifs à l'inclusion ou à l'exclusion d'articles ont été discutés et résolus par consensus. Vingt-quatre articles rencontraient tous les critères d'admissibilité. Parmi ces vingt-quatre, 18 concernaient des familles ayant reçu les services de protection de l'enfance (SPE) et les six autres articles portaient sur des familles immigrantes et réfugiées ne bénéficiant pas de SPE. Ces six études documentaient la perception parentale de la violence physique faite aux enfants, les facteurs de stress vécus par les familles et les pratiques disciplinaires physiques abusives (actuelles ou passées). Ces données étaient recueillies de manière auto-rapportée.

Nous avons utilisé l'AGREE<sup>6</sup> afin d'évaluer la qualité des données fournies par les études. L'AGREE est un instrument utile pour évaluer de manière critique la rigueur méthodologique (par exemple, la représentativité de l'échantillon), la mise en œuvre (par exemple, la cohérence de la méthode), la fidélité des mesures des résultats ainsi que la qualité des résultats.

Tableau 1. Processus en cinq étapes pour la recherche et la sélection des articles

| Étapes de la recherche                   |                                                                                    | Stratégie de recherche                                                                                                                                                                                                                                                                                                                                     | Résultats de la recherche : nombre d'études           |
|------------------------------------------|------------------------------------------------------------------------------------|------------------------------------------------------------------------------------------------------------------------------------------------------------------------------------------------------------------------------------------------------------------------------------------------------------------------------------------------------------|-------------------------------------------------------|
| Identification                           | 1) Développement du protocole de recherche bibliographique                         | <ul style="list-style-type: none"><li>Mots-clés (avec synonymes et troncations)</li><li>Recherche dans les bases de données : PsycINFO, MEDLINE, ERIC, Famili@, Social services abstracts</li><li>Complément de recherche : sites internet, liste des références des articles pertinents (sélectionnés)</li></ul>                                          | # d'articles trouvés : 624                            |
| Sélection                                | 2) Recherche et identification des articles rencontrant les critères d'éligibilité | Critères d'éligibilité: <ul style="list-style-type: none"><li>Méthodologie qualitative ou quantitative;</li><li>Article publié dans une revue évaluée par les pairs</li><li>Rédigé en anglais ou en français</li><li>Décrit, évalue ou aborde la prévalence et les facteurs de risque et de protection</li><li>Population immigrante ou réfugiée</li></ul> | # d'articles éligibles : 495                          |
| Évaluation de l'éligibilité des articles | 3) Sélection des articles pertinents par deux réviseuses                           | La première sélection s'est faite à partir du titre et du résumé des articles et a été évaluée par deux réviseuses.<br>Une deuxième étape de révision a été faite après avoir lu les articles en entier par les deux réviseuses, séparément.<br>Discussion des deux réviseuses quant à l'exclusion et l'inclusion des articles et décision par consensus.  | # d'articles éligibles : 495<br># d'articles lus : 49 |
| Études sélectionnées                     | 4) Organisation des données<br>5) Résumé, synthèse et divulgation des résultats    |                                                                                                                                                                                                                                                                                                                                                            | # d'articles inclus : 24                              |

Les études admissibles ont ensuite été revues et résumées individuellement afin d'intégrer et de synthétiser les données. Cette

synthèse était nécessaire pour l'intégration des résultats dans un cadre écosystémique. Les 24 études<sup>11-34</sup> (échantillon, mesures des effets,

instruments et évaluation selon le AGREE) sont présentées dans le Tableau 2 et sont accompagnées du score obtenu au moyen de l'AGREE. Compte tenu de l'hétérogénéité des études relativement à leur échantillon, leur méthodologie et des mesures des effets, nous avons décidé de présenter les résultats en se rapportant aux questions clés et au modèle écosystémique. Les dernières étapes de cette revue systématique sont présentées dans la section discussion. Elles consistent en l'identification des principales conclusions, des principales lacunes dans la littérature existante et finalement, des recommandations pour les recherches futures.

### Le cadre d'analyse écosystémique

Le modèle théorique d'analyse écosystémique guide la présentation des résultats, leur interprétation ainsi que les recommandations qui en découlent. Le modèle est issu des travaux de Garbarino,<sup>35</sup> Belsky<sup>36</sup> et Cicchetti (e.g. Cicchetti & Lynch)<sup>37</sup> qui ont adapté le modèle écologique de Bronfenbrenner<sup>38,39</sup> au contexte de la maltraitance envers les enfants. Les variables sont donc organisées selon différents niveaux d'analyse et elles sont conceptualisées comme des facteurs de risque et de protection. L'interaction de ces différents facteurs est susceptible d'amener une augmentation de la probabilité de maltraitance d'enfants. Le modèle écosystémique est ici appliqué dans le contexte spécifique des familles immigrantes. Les systèmes ont été définis de la façon suivante : 1) l'ontosystème renvoie aux différents aspects du développement ontogénétique de l'enfant<sup>36,40</sup> qui peuvent même se rapporter au vécu de l'enfant avant l'immigration (e.g. expériences traumatiques, malnutrition). Ce vécu accompagne l'enfant dans son nouveau pays hôte; 2) le microsystème fait référence à l'environnement avec lequel l'enfant entretient des contacts directs. Le microsystème inclut donc le vécu et les caractéristiques des parents, la relation parent-enfant, les pratiques parentales culturellement déterminées, les croyances, les pratiques religieuses et ethniques, la garderie et l'école; 3) le mésosystème inclut les interactions entre les différents microsystèmes. L'enfant est donc en contact direct avec tous les éléments du mésosystème; 4) l'exosystème inclut les variables relatives au milieu de travail des parents, le voisinage et les communautés, le support ou l'isolement social, le taux de chômage et l'accès aux ressources économiques; 5) le macrosystème est composé des croyances et des pratiques culturelles dominantes dans la société d'accueil. Elles peuvent être discordantes de celles pratiquées par les parents immigrants ou réfugiés et 6) le chronosystème renvoie au passage du temps. Tous les systèmes sont concentriques et s'emboîtent les uns dans les autres. Ils sont donc constamment en relation et s'influencent de manière réciproque et complexe et ce, à différents niveaux. Les systèmes meso, macro et chrono ont été exclus des résultats de cette revue de la littérature. En effet, aucune des études relevées ne faisait mention de facteurs de risque ou de protection se retrouvant dans ces niveaux.

## RÉSULTATS

### Question clé 1: Les enfants immigrants et/ou réfugiés sont-ils plus à risque de maltraitance?

Les données officielles sur les taux de maltraitance des enfants aux États-Unis et au Canada ne rapportent pas d'information sur le statut d'immigration et donc, elles ne peuvent être retenues dans cette revue de la littérature. Actuellement, les sources les plus fiables prennent la forme d'études non-officielles. Ces études ont été réalisées avec des échantillons non-représentatifs des familles immigrantes ou réfugiées ayant reçu les services de protection de l'enfance (SPE).

### Études avec familles immigrantes impliquées avec les services de protection de l'enfance (SPE)

Un total de dix-huit études concernant les familles ayant reçu des services des SPE ont été jugées admissibles. Six d'entre elles ont relevé que les enfants issus de familles immigrantes sont représentés de manière disproportionnelle dans les SPE. Deux études réalisées aux Pays-Bas ont montré que les enfants issus de l'immigration étaient surreprésentés par rapport à la population générale.<sup>11,20</sup> À l'inverse, trois études réalisées aux États-Unis et utilisant les données de l'Enquête nationale sur le bien-être de

l'enfant et de l'adolescent (NSCAW), démontrent que les enfants immigrants (toutes nationalités confondues<sup>16</sup> et immigrants de l'Amérique Latine)<sup>17,18</sup> étaient sous-représentés dans les SPE par rapport à la population générale.<sup>16-18</sup> Parmi les immigrants d'origine asiatique résidant à Los Angeles, il a été constaté que les familles immigrantes d'origine vietnamienne, cambodgienne, laotienne, des îles du Pacifique et samoanes étaient surreprésentées dans les SPE alors que les familles immigrantes des Philippines, les familles hmong et coréennes étaient quant à elles sous-représentées.<sup>21</sup>

Trois études réalisées en Californie ont examiné les facteurs potentiellement liés aux signalements de maltraitance d'enfants immigrants. Elles ont démontré que les familles hispaniques monoparentales (mère) ou ayant les deux parents<sup>22</sup> nés à l'extérieur des États-Unis et/ou ayant reçu des prestations financières de *Medi-Cal assistance* (programme de santé publique dans l'état de Californie)<sup>30</sup> étaient significativement moins signalées ou prises en charge par les SPE pour maltraitance, comparativement aux enfants hispaniques ayant une mère née aux États-Unis.<sup>22,29,30</sup>

Parmi ces 18 études, onze exploraient le type de maltraitance en fonction du pays d'origine (voir le tableau 3 pour les détails des résultats de ces études). Les résultats montrent généralement que les enfants de familles immigrantes sont plus souvent signalés pour abus physique<sup>11,15,18,20,21,26,31,32</sup> et qu'ils sont moins sujets de faire l'expérience de négligence physique,<sup>11,14</sup> de négligence émotionnelle ou éducative,<sup>11,20</sup> d'abus sexuel<sup>16,17,26</sup> ou de vivre de l'abus émotionnel.<sup>20,26</sup> Les auteurs expliquent que les différences relatives aux taux d'abus émotionnel pourraient être attribuables aux différentes pratiques parentales et aux attentes relatives à l'éducation des enfants.<sup>16,32</sup> Des études réalisées avec des familles d'origine mexicaine<sup>26</sup> et coréenne<sup>15</sup> soulignent aussi que ces différences pourraient aussi être dues à la présence de violence conjugale.

### Études avec des enfants immigrants n'étant PAS impliqués dans les SPE

Les études réalisées avec des familles immigrantes n'ayant pas reçu les SPE se concentrent généralement sur les pratiques parentales, notamment l'utilisation de mesures disciplinaires physiques. Lau, Takeuchi et Alegria rapportent un taux inférieur d'agressions mineures du parent envers l'enfant ainsi qu'un taux supérieur d'agressions physiques sévères chez les mères asiatiques nées à l'étranger en comparaison aux parents nés aux États-Unis.<sup>23</sup> Une étude réalisée dans l'état de Washington montre que 50% des parents immigrants d'origine cambodgienne et 56% des parents d'origine vietnamienne (57% dans une étude réalisée par Segal<sup>33</sup>) rapportent avoir eu recours à des mesures disciplinaires physiques avec leurs enfants.<sup>34</sup> Dans une quatrième étude, Altschul & Lee rapportent que les mères hispaniques nées à l'étranger sont significativement moins portées à discipliner physiquement leurs enfants de cinq ans en comparaison avec les mères nées au pays, après avoir contrôlé les facteurs de risques maternels d'ordre psychosociaux, les comportements des enfants et les facteurs sociodémographiques.<sup>12</sup> Une étude texane rapporte quant à elle que les mères immigrantes d'origine coréenne n'étaient pas en faveur de la violence physique faite aux enfants, mais elles étaient en faveur de mesures disciplinaires physiques.<sup>27</sup> Finalement, une étude réalisée en Norvège révèle que les enfants de parents immigrants présentent un risque supérieur d'être témoin de violence conjugale, considérée comme de la maltraitance (psychologique ou émotionnelle) par certains SPE.<sup>13</sup>

### Question clé 2: Quels sont les facteurs de risque et de protection relatifs à la maltraitance d'enfant dans des populations réfugiées et immigrantes et ce, selon le modèle écosystémique?

### Les facteurs de risque ontosystémiques

Quelques études ont examiné les caractéristiques de personnalité et les caractéristiques développementales en lien avec la maltraitance. Aucune

**Tableau 2.** Synthèse des études sur les facteurs de risque et de protection quant à la maltraitance chez les familles immigrantes et réfugiées

| Auteurs                                                                  | Échantillon                                                                                                                                                                                                                                                                                                                                                                                  | Variables mesurées                                                                                                                                                                                                                                                                                                                                                                                                                                                                                                                                                                                                                                                                                                                                                                               | Instruments                                                                                                                                                                                                                                                                                                                                                                                              | Évaluation de la rigueur des études* |
|--------------------------------------------------------------------------|----------------------------------------------------------------------------------------------------------------------------------------------------------------------------------------------------------------------------------------------------------------------------------------------------------------------------------------------------------------------------------------------|--------------------------------------------------------------------------------------------------------------------------------------------------------------------------------------------------------------------------------------------------------------------------------------------------------------------------------------------------------------------------------------------------------------------------------------------------------------------------------------------------------------------------------------------------------------------------------------------------------------------------------------------------------------------------------------------------------------------------------------------------------------------------------------------------|----------------------------------------------------------------------------------------------------------------------------------------------------------------------------------------------------------------------------------------------------------------------------------------------------------------------------------------------------------------------------------------------------------|--------------------------------------|
| Alink, Euser, van Ijzendoorn, & Bakermans-Kranenburg, 2013 <sup>11</sup> | Données provenant de la deuxième <i>Netherlands Prevalence Study of Maltreatment of youth</i> , 2010:<br>- 1127 professionnels<br>- 12 127 familles; dossiers retenus en 2010 par les services de protection de l'enfance (SPE) néerlandais<br>- 1759 étudiants de niveau secondaire (Néerlandais: 88%; Marocains: 4%; Turcs: 3%; Surinamais: 1%; Antillais: 1%; Autre origine ethnique: 3%) | - Par les professionnels: statut d'immigration, composition familiale (nombre d'enfants, monoparentalité, familles recomposées), niveau de scolarité (plus haut niveau des parents)<br>- Dossiers des services de protection: type de maltraitance, origine ethnique, nombre d'enfants, monoparentalité, familles recomposées<br>- Divulgarion des étudiants: type de maltraitance, caractéristiques sociodémographiques, personnelles et familiales                                                                                                                                                                                                                                                                                                                                             | - Professionnels: formulaire standardisé<br>- Analyse descriptive des dossiers des services de protection de l'enfance<br>- Divulgarion des étudiants: questionnaire basé sur le <i>Dating Violence Questionnaire</i> et le <i>Parent-Child Conflict Tactics Scales</i>                                                                                                                                  | 4                                    |
| Altschul & Lee, 2011 <sup>12</sup>                                       | Participants à l'étude <i>Fragile Families and Child Wellbeing Study (FFCWS)</i> : 328 mères Hispaniques nées à l'étranger et 517 mères hispaniques nées aux États-Unis (É-U)                                                                                                                                                                                                                | - Utilisation de l'agression physique envers les enfants, par les mères<br>- Indicateurs de l'acculturation: lieu de naissance, nombre d'années de résidence aux É-U, pratique religieuse, rôles traditionnels de genre<br>- Facteurs de risque psychosociaux des mères : stress parental, dépression majeure, grande consommation d'alcool, violence conjugale, facteurs liés aux comportements des enfants, variables socioéconomiques et démographiques (revenu familial, niveau de scolarité, statut marital, âge de la mère à la naissance des enfants, sexe de l'enfant)<br>- Catégorie de la violence conjugale, sévérité, fréquence, durée, régularité et prédictibilité<br>- Sentiment de culpabilité et de honte<br>- Origine ethnique du conjoint<br>- Exposition des enfants à la VC | - <i>Parent-Child Conflict Tactics Scale</i><br>- <i>Parenting Stress Index Short Form</i><br>- DSM-III-R<br>- Mesure du <i>National Institute on Alcohol Abuse and Alcoholism</i> (2005)<br>- Échelle développée par les auteurs, qui inclut des items de Lloyd (1996) et du <i>Spouse Observation Checklist</i> et du <i>Conflict Tactics Scale</i><br>- <i>Child Behavior Checklist 1 ½ - 5 years</i> | 3                                    |
| Bø Vatnar & Bjørkly, 2010 <sup>13</sup>                                  | 157 entrevues effectuées auprès de femmes victimes de violence conjugale (VC) et souhaitant de l'aide à sujet. Recrutées en Norvège auprès de thérapeutes familiaux, des forces policières et des maisons d'hébergement.                                                                                                                                                                     | - Caractéristiques des victimes : (sexe, âge, type de garde, langue d'usage, problèmes de comportement, handicap)<br>- Type d'abus, sévérité et chronicité<br>- Caractéristique du parent abuseur (âge, sexe, statut marital, relation avec la victime, niveau de scolarité, durée de résidence au pays, problème de santé mental, abus de substance)<br>- Source du signalement, priorisation de l'intervention, décision relative au placement et type de placement                                                                                                                                                                                                                                                                                                                            | - Questionnaire sociodémographique structuré<br>- Questionnaire semi-structuré développé par les auteurs concernant la VC et qui inclut des items du <i>Conflict Tactics Scales</i><br>- Profil d'immigration (à partir <i>Statistics Norway's survey Level of Living</i> , 1995)<br>- Formulaire de collecte de données développé par les auteurs                                                       | 3                                    |
| Chang, Rhee & Megan Berthold, 2008 <sup>14</sup>                         | 243 dossiers de réfugiés cambodgiens pris en charge par le <i>Los Angeles County Department of Children and Family Services (LAC-DCFS)</i>                                                                                                                                                                                                                                                   | - Voir Chang et al, 2008 et ajout des circonstances entourant l'abus (violence conjugale, divorce, discipline excessive)                                                                                                                                                                                                                                                                                                                                                                                                                                                                                                                                                                                                                                                                         | - Formulaire de collecte de données développé par les auteurs                                                                                                                                                                                                                                                                                                                                            | 3                                    |
| Chang, Rhee & Weaver, 2006 <sup>15</sup>                                 | 170 dossiers actifs d'immigrants coréens signalés pour maltraitance à l' <i>Asian Pacific Unit (APU) of the LAC-DCFS</i>                                                                                                                                                                                                                                                                     | - Lieu de naissance du donneur de soins principal<br>- Caractéristiques sociodémographiques de l'enfant et du donneur de soins<br>- Caractéristiques de la famille et du ménage: revenu annuel, composition familiale, instabilité du donneur de soins, langue parlée à la maison<br>- Type de maltraitance signalée (alléguée) et retenue suite à l'évaluation<br>- Facteurs de risque du parent et de la famille: abus d'alcool; abus de drogue; problèmes mentaux ou émotifs; déficience physique, intellectuelle ou cognitive; faible habiletés parentales; violence conjugale; méthodes disciplinaires excessives; vécu de maltraitance chez le donneur de soins; arrestation; faible support social; haut niveau de stress familial; difficulté à répondre aux besoins de base             | - Entrevues NSCAW                                                                                                                                                                                                                                                                                                                                                                                        | 3                                    |
| Dettlaff & Earner, 2012 <sup>16</sup>                                    | Données provenant du <i>National Survey of Child and Adolescent Well-Being (NSCAW)</i> :<br>- 3717 enfants (0 à 14 ans) et qui habitent avec un parent biologique: 3366 avec un parent né aux É-U, 351 avec un parent immigrant                                                                                                                                                              |                                                                                                                                                                                                                                                                                                                                                                                                                                                                                                                                                                                                                                                                                                                                                                                                  |                                                                                                                                                                                                                                                                                                                                                                                                          |                                      |

| Tableau 2. Synthèse des études sur les facteurs de risque et de protection quant à la maltraitance chez les familles immigrantes et réfugiées |                                                                                                                                                                                                                                                                                                                                                                      |                                                                                                                                                                                                                                                                                                                                                                                                                                                                                               |                                                                                                                                                                                                                                                                                                                                                                                                                                                                                                                                                                                                                                                                                                                                  |                                      |
|-----------------------------------------------------------------------------------------------------------------------------------------------|----------------------------------------------------------------------------------------------------------------------------------------------------------------------------------------------------------------------------------------------------------------------------------------------------------------------------------------------------------------------|-----------------------------------------------------------------------------------------------------------------------------------------------------------------------------------------------------------------------------------------------------------------------------------------------------------------------------------------------------------------------------------------------------------------------------------------------------------------------------------------------|----------------------------------------------------------------------------------------------------------------------------------------------------------------------------------------------------------------------------------------------------------------------------------------------------------------------------------------------------------------------------------------------------------------------------------------------------------------------------------------------------------------------------------------------------------------------------------------------------------------------------------------------------------------------------------------------------------------------------------|--------------------------------------|
| Auteurs                                                                                                                                       | Échantillon                                                                                                                                                                                                                                                                                                                                                          | Variables mesurées                                                                                                                                                                                                                                                                                                                                                                                                                                                                            | Instruments                                                                                                                                                                                                                                                                                                                                                                                                                                                                                                                                                                                                                                                                                                                      | Évaluation de la rigueur des études* |
| Dettlaff, Earner & Philipps, 2009 <sup>17</sup>                                                                                               | Données du <i>National Survey of Child and Adolescent Well-Being</i> (NSCAW, 1999-2000)<br>- 636 enfants Hispaniques/Latinos (0-14 ans) habitant avec un parent biologique : 406 de parents nés aux É-U, 230 de parents immigrants                                                                                                                                   | Voir Dettlaff & Earner, 2012 et ajout de :<br>- Caractéristiques du quartier et de la communauté : ex. assauts, délinquance et gangs, usage ou commerce de drogue, enfants non-supervisés, sécurité du quartier, implication parentale, quartier où il fait bon vivre.                                                                                                                                                                                                                        | - Entrevues NSCAW                                                                                                                                                                                                                                                                                                                                                                                                                                                                                                                                                                                                                                                                                                                | 3                                    |
| Dettlaff & Johnson, 2011 <sup>18</sup>                                                                                                        | Données du <i>National Survey of Child and Adolescent Well-Being</i> (NSCAW, 1999-2001):<br>- 947 enfants Hispaniques/Latinos (0-14 ans): 891 enfants nés aux É-U et 56 enfants immigrants                                                                                                                                                                           | Voir Dettlaff & Earner, 2012                                                                                                                                                                                                                                                                                                                                                                                                                                                                  | - Rapport NSCAW des enfants, du donneur de soins et des intervenants des SPE<br>- Entrevues avec le donneur de soins principal                                                                                                                                                                                                                                                                                                                                                                                                                                                                                                                                                                                                   | 3                                    |
| Euser, Alink, Pannebakker, Vogels, Bakermans-Kranenburg, & Van Ijzendoorn, 2013 <sup>19</sup>                                                 | Données du deuxième <i>Netherlands Prevalence Study of Maltreatment of youth</i> (NPM-2010) :<br>- 1127 professionnels<br>- 22 661 dossiers retenus en 2010 par les SPE néerlandais<br>- 1920 étudiants de niveau secondaire (Néerlandais: 87%; Marocains: 4%; Turcs: 3%; Surinamais: 1%; Antillais: 1%; Autre origine ethnique: 3%)                                 | - Facteurs de risque dans l'étude des professionnels : plus haut niveau de scolarité des parents, chômage des parents, monoparentalité, famille nombreuse, familles recomposées, âge et sexe de l'enfant<br>- Dossiers des SPE: mêmes facteurs de risque sauf niveau de scolarité et chômage des parents<br>- Divulgaration des étudiants: statut socioéconomique, niveau d'éducation de l'étudiant, monoparentalité, grosseur de la famille, statut d'immigration, âge et sexe de l'étudiant | - Professionnels et agences des SPE : formulaire standardisé créé à partir des études NIS et NPM-2005<br>- Questionnaire auto-rapporté par les étudiants: comportant des items du <i>Dating Violence Questionnaire</i> et du <i>Parent-Child Conflict Tactics Scales</i>                                                                                                                                                                                                                                                                                                                                                                                                                                                         | 4                                    |
| Euser, van Ijzendoorn, Prinzie, and Bakermans-Kranenburg, 2011 <sup>20</sup>                                                                  | Données du NPM-2005<br>- 1121 professionnels<br>- 795 enfants : 546 Néerlandais d'origine, 163 issus de familles immigrantes traditionnelles, 113 issus de familles immigrantes-non-traditionnelles<br>- Échantillon de la population générale : 3089 familles (91.6% Néerlandais d'origine, 4.6% d'immigrants traditionnels et 3.8% d'immigrants non-traditionnels) | - Statut d'immigration, risque de maltraitance envers l'enfant, type de maltraitance, niveau de scolarité, composition familiale (monoparentalité et grosseur de la famille)                                                                                                                                                                                                                                                                                                                  | - Formulaire standardisé développé par les auteurs                                                                                                                                                                                                                                                                                                                                                                                                                                                                                                                                                                                                                                                                               | 3                                    |
| Ima & Hohm, 1991 <sup>21</sup>                                                                                                                | 158 dossiers de familles Asiatiques ou de familles des îles du Pacifique suivis pour maltraitance par l' <i>Union of Pan Asian Communities</i> (UPAC) à San Diego, Californie                                                                                                                                                                                        | - Caractéristiques de la victime (sexe, âge, origine ethnique), type de maltraitance, caractéristiques de l'abuseur (non-spécifiées)                                                                                                                                                                                                                                                                                                                                                          | - Entrevues avec les intervenants des SPE<br>- Analyse des dossiers<br>- Observation sur le terrain                                                                                                                                                                                                                                                                                                                                                                                                                                                                                                                                                                                                                              | 1                                    |
| Johnson-Motoyama, Dettlaff, & Finno, 2012 <sup>22</sup>                                                                                       | Données du deuxième <i>National Survey of Child and Adolescent Well-Being</i> (NSCAW, 2008-2009)<br>- 713 enfants hispaniques de parents nés aux É-U (470), d'un parent né aux É-U et l'autre immigrant (90), de deux parents immigrants (153)                                                                                                                       | - Voir Dettlaff & Earner, 2012 et ajout de :<br>- Caractéristiques du dossier, évaluations des intervenants et caractéristiques des intervenants                                                                                                                                                                                                                                                                                                                                              | - <i>Limited Maltreatment Classification System</i> (Barnett et al., 1993) afin d'évaluer le type de maltraitance                                                                                                                                                                                                                                                                                                                                                                                                                                                                                                                                                                                                                | 3                                    |
| Lau, Takeuchi & Alegria, 2006 <sup>23</sup>                                                                                                   | 1293 entrevues réalisées auprès de parents américains d'origine asiatique dans le cadre du <i>National Latino and Asian American Study survey</i>                                                                                                                                                                                                                    | - Indicateurs sociodémographiques et socioéconomiques<br>- Origine ethnique et lieu de naissance<br>- Stresseurs contextuels                                                                                                                                                                                                                                                                                                                                                                  | - Entrevues : variables sociodémographiques, perception du statut social (Adler et al., 2000); identité ethnique et acculturation ( <i>Cultural Identity Scales for Latino Adolescents</i> , Felix-Ortiz et al., 1994); conflits familiaux liés à la culture ( <i>Family Cultural Stress subscale of the Hispanic Stress Inventory</i> , Cervantes et al., 1991); proximité de la famille (Olson et al., 1983); discrimination perçue ( <i>Detroit Area Study</i> , Williams et al., 1997); agression du parent envers l'enfant ( <i>National Comorbidity Survey adaptation of the Parent-Child CTS</i> , Straus et al., 1998); désirabilité sociale ( <i>Marlow-Crowne Social Desirability Scale</i> , Strahan & Gerbasi, 1972) | 3                                    |

| Tableau 2. Synthèse des études sur les facteurs de risque et de protection quant à la maltraitance chez les familles immigrantes et réfugiées |                                                                                                                                                                                                                |                                                                                                                                                                                                                                                                                                                                                                                                                                                                                                                                                                                       |                                                                                                                                                                                                               |                                      |
|-----------------------------------------------------------------------------------------------------------------------------------------------|----------------------------------------------------------------------------------------------------------------------------------------------------------------------------------------------------------------|---------------------------------------------------------------------------------------------------------------------------------------------------------------------------------------------------------------------------------------------------------------------------------------------------------------------------------------------------------------------------------------------------------------------------------------------------------------------------------------------------------------------------------------------------------------------------------------|---------------------------------------------------------------------------------------------------------------------------------------------------------------------------------------------------------------|--------------------------------------|
| Auteurs                                                                                                                                       | Échantillon                                                                                                                                                                                                    | Variables mesurées                                                                                                                                                                                                                                                                                                                                                                                                                                                                                                                                                                    | Instruments                                                                                                                                                                                                   | Évaluation de la rigueur des études* |
| Lindell & Svedin, 2004 <sup>24</sup>                                                                                                          | 113 enfants signalés aux policiers et SPE pour abus physique, en Suède (3 groupes: 1) tous les enfants; 2) enfants de parents immigrants et 3) enfants blessés suite à l'abus physique)                        | <ul style="list-style-type: none"> <li>- Âge</li> <li>- Sexe</li> <li>- Origine ethnique</li> <li>- Blessures</li> <li>- Toutes les interventions des services de protection et les contacts ayant eu lieu avant l'abus physique et au moment de celui-ci</li> <li>- Facteurs de risque: âge, sexe, origine ethnique, abus de substance des parents, problème de santé mentale des parents, signalements antérieurs aux SPE, interventions sociales antérieures et blessures résultant de l'abus physique</li> </ul>                                                                  | - Dossiers des SPE                                                                                                                                                                                            | 3                                    |
| Maiter, Stalker & Alaggia, 2009 <sup>25</sup>                                                                                                 | 20 parents immigrants provenant du Sud-Est Asiatique, vivant au Canada et impliqués auprès des SPE                                                                                                             | <ul style="list-style-type: none"> <li>- Stresseurs dans la vie des parents immigrants. Entrevue où 15 thèmes sont abordés et qui concernent l'expérience migratoire, le stress lié à l'acculturation, la vie familiale et l'implication des SPE dans leur vie.</li> </ul>                                                                                                                                                                                                                                                                                                            | - Guide d'entrevue qualitative développé par les auteures                                                                                                                                                     | 3                                    |
| Osterling & Han, 2011 <sup>26</sup>                                                                                                           | 2 152 enfants; données administratives provenant des systèmes de protection (CWS/CMS) et combinées à aux données éligibles d'un autre système (CaIWIN)                                                         | <ul style="list-style-type: none"> <li>- Caractéristiques démographiques</li> <li>- Caractéristiques liées à l'immigration (citoyenneté des parents et de l'enfant)</li> <li>- Caractéristiques des dossiers (type de maltraitance, nombre et types de placement, signalements antérieurs, durée de l'implication des SPE)</li> <li>- Facteurs liés à la réunification</li> </ul>                                                                                                                                                                                                     | <ul style="list-style-type: none"> <li>- Bases de données administratives et des SPE</li> <li>- Formulaire de collecte des données développé par les auteurs</li> </ul>                                       | 3                                    |
| Park, 2001 <sup>27</sup>                                                                                                                      | 144 mères coréennes immigrantes                                                                                                                                                                                | <ul style="list-style-type: none"> <li>- Attitudes, croyances et perceptions concernant l'abus physique envers les enfants et résolution des conflits</li> <li>- Variables écologiques aux niveaux micro, meso, exo et macro</li> </ul>                                                                                                                                                                                                                                                                                                                                               | - Questionnaire développé par les auteurs : caractéristiques démographiques et personnelles, mesure des conflits liés à l'acculturation et l'attitude des mères concernant l'abus physique envers les enfants | 3                                    |
| Parrish, Young, Perham-Hester & Gessner, 2011 <sup>28</sup>                                                                                   | Tous les répondants PRAMS ( <i>Pregnancy Risk Assessment Monitoring System</i> ) pour les naissances des années 1997-1999 (29432: 3441 avec des dossiers SPE de 1997 à 2004 et 25991 sans implication des SPE) | <ul style="list-style-type: none"> <li>- 24 facteurs: 6 provenant des dossiers de naissance, 16 de PRAMS, 2 de chacun (facteurs démographiques, relatifs à de l'abus physique/sexuel de la mère, préoccupations financières, abus de substance, grossesse planifiée ou non, facteurs relatifs à l'attachement et la cohésion familiale)</li> </ul>                                                                                                                                                                                                                                    | - Formulaire de collecte de données développé par les auteurs                                                                                                                                                 | 4                                    |
| Putnam-Horstein, Needell, King & Johnson-Motoyama, 2013 <sup>29</sup>                                                                         | Voir Putnam-Horstein & Needell, 2011                                                                                                                                                                           | <ul style="list-style-type: none"> <li>- Origine ethnique et race de l'enfant comme prédicteurs de signalement pour maltraitance, de la rétention du signalement, de placement hors de la famille de l'enfant</li> <li>- Seulement pour les enfants Latinos : lieu de naissance de la mère (aux É-U ou à l'étranger)</li> <li>- Covariables: sexe, poids à la naissance, suivi de grossesse, anomalies à la naissance, âge et niveau de scolarité de la mère, reconnaissance de la paternité, ordre de naissance dans la famille, assurance médicale</li> </ul>                       | - Voir Putnam-Horstein & Needell, 2011                                                                                                                                                                        | 4                                    |
| Putnam-Horstein & Needell, 2011 <sup>30</sup>                                                                                                 | Cohorte entière des enfants nés en Californie en 2002 (531 035 enfants) et les dossiers des SPE de ces enfants qui ont été signalés pour maltraitance avant l'âge de 5 ans                                     | <ul style="list-style-type: none"> <li>- Sexe de l'enfant, poids à la naissance, suivi de grossesse, anomalies à la naissance, lieu de naissance de la mère, origine ethnique/race, âge et niveau de scolarité de la mère, nombre d'avortements, reconnaissance de la paternité, nombre d'enfants, méthode de paiement pour l'accouchement</li> </ul>                                                                                                                                                                                                                                 | - Formulaire de collecte de données développé par les auteurs                                                                                                                                                 | 4                                    |
| Rhee, Chang, Berthold & Mar, 2012 <sup>31</sup>                                                                                               | 124 dossiers de réfugiés vietnamiens, traités par l'APU du LAC-DCFS                                                                                                                                            | <ul style="list-style-type: none"> <li>- Voir Chang, Rhee &amp; Megan Berthold, 2008</li> </ul>                                                                                                                                                                                                                                                                                                                                                                                                                                                                                       | - Formulaire de collecte de données développé par les auteurs                                                                                                                                                 | 3                                    |
| Rhee, Chang, Weaver & Wong, 2008 <sup>32</sup>                                                                                                | 221 dossiers actifs de familles chinoises, traités par l'APU du LAC-DCFS                                                                                                                                       | <ul style="list-style-type: none"> <li>- Caractéristiques de la victime: sexe, âge, langue d'usage, problèmes de comportement</li> <li>- Caractéristiques du parent abuseur : âge, sexe, statut marital, relation avec la victime, langue d'usage, niveau de scolarité, occupation, durée de résidence aux É-U, garde de l'enfant</li> <li>- Caractéristiques familiales: circonstances sous lesquelles l'abus est survenu, présence de problèmes familiaux</li> <li>- Source du signalement, priorité de la réponse, décision relative au placement et type de placement.</li> </ul> | - Formulaire de collecte de données développé par les auteurs                                                                                                                                                 | 3                                    |

| <b>Tableau 2. Synthèse des études sur les facteurs de risque et de protection quant à la maltraitance chez les familles immigrantes et réfugiées</b>                                                                                                                              |                                                                                                                                                                                                        |                                                                                                                                                                                                                                                                                                                                                                                                                                                                                                                                                                                                         |                                                                                                                                                                                                                                                                                                                                                                                                                                                                                                                                                                                                                                                                         |                                             |
|-----------------------------------------------------------------------------------------------------------------------------------------------------------------------------------------------------------------------------------------------------------------------------------|--------------------------------------------------------------------------------------------------------------------------------------------------------------------------------------------------------|---------------------------------------------------------------------------------------------------------------------------------------------------------------------------------------------------------------------------------------------------------------------------------------------------------------------------------------------------------------------------------------------------------------------------------------------------------------------------------------------------------------------------------------------------------------------------------------------------------|-------------------------------------------------------------------------------------------------------------------------------------------------------------------------------------------------------------------------------------------------------------------------------------------------------------------------------------------------------------------------------------------------------------------------------------------------------------------------------------------------------------------------------------------------------------------------------------------------------------------------------------------------------------------------|---------------------------------------------|
| <b>Auteurs</b>                                                                                                                                                                                                                                                                    | <b>Échantillon</b>                                                                                                                                                                                     | <b>Variables mesurées</b>                                                                                                                                                                                                                                                                                                                                                                                                                                                                                                                                                                               | <b>Instruments</b>                                                                                                                                                                                                                                                                                                                                                                                                                                                                                                                                                                                                                                                      | <b>Évaluation de la rigueur des études*</b> |
| Segal, 2000 <sup>33</sup>                                                                                                                                                                                                                                                         | - 28 parents vietnamiens réfugiés ayant un enfant de 8 à 18 ans qui réside avec eux<br>- 28 de ces enfants (1 enfant par parent interrogé)                                                             | - Variables démographiques (âge, statut marital, niveau de scolarité, santé, occupation, revenu familial, nombre d'enfants, durée de résidence aux É-U, occupation au Vietnam)<br>- Entrevue avec les parents: questions relatives à l'établissement au pays d'accueil, l'acculturation, les réseaux de support, l'éducation des enfants aux É-U, l'utilisation des services<br>- Entrevue avec les enfants: sujets relatifs à l'école, les passe-temps, les relations d'amitié avec des enfants américains, relation avec la fratrie, perception des méthodes disciplinaires utilisées par les parents | - Questionnaire démographique<br>- Entrevue semi-structurée avec les parents<br>- Entrevue semi-structurée avec les enfants<br>- <i>Child Abuse Potential Inventory</i><br>- <i>Conflict Tactics Scale</i><br>- <i>Basic English Skills Test (BEST)</i>                                                                                                                                                                                                                                                                                                                                                                                                                 | 3                                           |
| Tajima and Harachi, 2010 <sup>34</sup>                                                                                                                                                                                                                                            | - Données des entrevues réalisées en 2002 dans le cadre du <i>Cross-Cultural Families project</i> dans l'état de Washington<br>- Parents vietnamiens et cambodgiens, immigrants de première génération | - Variables démographiques<br>- Croyances parentales<br>- Pratiques disciplinaires physiques<br>- Arrêt ou non du cycle intergénérationnel de d'utilisation de la discipline physique<br>- Acculturation<br>- Support personnel<br>- Support du voisinage<br>- Dépression<br>- Problèmes de comportement de l'enfant<br>- Structure familiale<br>- Niveau de scolarité                                                                                                                                                                                                                                  | - Entrevues avec des items provenant du <i>Child Development Survey of the Panel Study on Income Dynamics</i> (Hofferth et al, 1998)<br>- Items sélectionnés du <i>Conflict Tactics Scale</i><br>- Items sélectionnés du <i>National Family Violence Survey</i> de 1985<br>- <i>Suinn-Lew Asian Self-Identity Acculturation Scale</i> et échelle d'acculturation sur un continuum développée par les auteurs<br>- Cinq items du <i>Social Support Behaviors Scale</i><br>- Items développés pour l'étude <i>CCF</i><br>- 15 items de la <i>Hopkins Symptom checklist</i><br>- Échelle développée par les auteurs pour mesurer les problèmes de comportement de l'enfant | 3                                           |
| * 4 = Aucune limite majeure; 3 = Limites concernant la représentativité de l'échantillon; 2 = Limites concernant la représentativité de l'échantillon OU la cohérence de la méthode de recherche et des objectifs; 1 = Limites importantes menant à des résultats non-concluants. |                                                                                                                                                                                                        |                                                                                                                                                                                                                                                                                                                                                                                                                                                                                                                                                                                                         |                                                                                                                                                                                                                                                                                                                                                                                                                                                                                                                                                                                                                                                                         |                                             |

**Tableau 3:** Type de maltraitance selon l'origine ethnique et/ou le statut d'immigration des familles

| Auteurs                                                                                                                                                          | Type de maltraitance dans les dossiers en protection de l'enfance                                                                                                                                                                                                                                                      |
|------------------------------------------------------------------------------------------------------------------------------------------------------------------|------------------------------------------------------------------------------------------------------------------------------------------------------------------------------------------------------------------------------------------------------------------------------------------------------------------------|
| Alink et al., 2013 <sup>11</sup>                                                                                                                                 | - Familles immigrantes traditionnelles <sup>*</sup> : surreprésentées pour la négligence physique, émotionnelle et éducative<br>- Familles immigrantes non-traditionnelles <sup>†</sup> : surreprésentées pour l'abus physique                                                                                         |
| Chang et al., 2008 <sup>14</sup>                                                                                                                                 | - Enfants cambodgiens sont plus signalés pour de la négligence (41.2%) et moins pour de l'abus sexuel (4.9%) en comparaison aux autres enfants de l'Asie Pacifique.                                                                                                                                                    |
| Chang et al., 2006 <sup>15</sup>                                                                                                                                 | - Enfants coréens sont plus signalés pour de l'abus physique (49.4%) et moins pour de la négligence (20.6%) ou de l'abus sexuel (1.8%) en comparaison aux autres groupes vivant dans la même région.                                                                                                                   |
| Dettlaff & Earner, 2012 <sup>16</sup>                                                                                                                            | - L'abus sexuel (20.7%) est significativement plus signalé (mais non retenu après évaluation) pour les enfants de parents immigrants.<br>- L'abus émotionnel (signalé : 19.7% et retenu après évaluation: 25.1%) est significativement plus signalé et retenu après évaluation pour les enfants de parents immigrants. |
| Dettlaff & Johnson, 2011 <sup>18</sup>                                                                                                                           | - L'abus physique (75.7%) est significativement plus retenu après évaluation pour les enfants de parents immigrants Latins.                                                                                                                                                                                            |
| Dettlaff et al., 2009 <sup>17</sup>                                                                                                                              | - L'abus sexuel (signalé: 22.1% et retenu après évaluation : 23.7%) est significativement plus signalé et retenu après évaluation pour les enfants de parents immigrants Latins.                                                                                                                                       |
| Euser et al., 2011 <sup>20</sup>                                                                                                                                 | - Familles immigrantes traditionnelles <sup>*</sup> : surreprésentées pour l'abus physique et pour la négligence émotionnelle et éducative.<br>- Familles immigrantes non-traditionnelles <sup>†</sup> : surreprésentées pour l'abus physique et émotionnelle.                                                         |
| Ima & Hohm, 1991 <sup>21</sup>                                                                                                                                   | - Les enfants asiatiques et provenant des îles du Pacifique sont plus souvent signalés pour de l'abus physique (53%) et moins pour de la négligence (36.1%), de l'abus sexuel (4.9%) ou émotionnel (6%) en comparaison à la population américaine.                                                                     |
| Osterling & Han, 2011 <sup>26</sup>                                                                                                                              | - Les enfants de mères nées au Mexique font significativement plus l'objet d'une intervention pour de l'abus physique (18.1%), de l'abus sexuel (9.7%) et de l'abus émotionnel (8.1%) mais significativement moins pour de la négligence sévère (13.3%) que les enfants non-immigrants.                                |
| Rhee et al., 2012 <sup>31</sup>                                                                                                                                  | - Les enfants vietnamiens sont plus souvent signalés pour de l'abus physique (51.6%) et moins pour incapacité ou absence du donneur de soins (3.3%).                                                                                                                                                                   |
| Rhee et al., 2008 <sup>32</sup>                                                                                                                                  | - Les enfants chinois sont plus souvent signalés pour de l'abus physique (35.3%) et moins pour de la négligence (22.3%) ou de l'abus sexuel (4.9%) en comparaison aux autres groupes vivant dans la même région.                                                                                                       |
| <sup>*</sup> Provenant de pays ayant une longue histoire d'immigration aux Pays-Bas : Turquie, Maroc, Suriname et Antilles                                       |                                                                                                                                                                                                                                                                                                                        |
| <sup>†</sup> Provenant des autres pays, et sont souvent réfugiés : Afrique (sauf le Maroc), Europe de l'Est, Asie Centrale, Amérique du Sud et Amérique Centrale |                                                                                                                                                                                                                                                                                                                        |

d'entre elles n'a cependant relevé de problèmes de comportements ou des handicaps chez la majorité des enfants victimes de maltraitance.<sup>14,15,31,32</sup> Trois études ne rapportent aucune différence en ce qui concerne la maltraitance selon le genre des enfants.<sup>14,31,32</sup> Par contre, trois autres études rapportent que le sexe masculin constitue un facteur de risque<sup>18,27,34</sup> et trois études rapportent que les filles issues de familles immigrantes sont davantage représentées dans les SPE.<sup>16,21,22</sup> Deux études rapportent que les enfants présents dans les SPE et nés à l'extérieur des États-Unis étaient plus âgés que les enfants bénéficiant des SPE nés aux États-Unis.<sup>17,26</sup> Dans l'étude de Johnson-Motoyama et al., les enfants victimes de maltraitance ayant un parent né à l'étranger étaient significativement plus âgés que les enfants ayant deux parents nés aux États-Unis.<sup>22</sup>

### Les facteurs de risque microsystemiques

La plupart des études ont recensé les caractéristiques des parents ayant reçu les services de SPE. Bien que les auteurs de ces études n'investiguent pas la relation entre ces mêmes caractéristiques et la probabilité de maltraitance d'enfants, nous croyons qu'elles peuvent être considérées comme de potentiels facteurs de risque. Quelques études rapportent que les parents immigrants et ayant reçu les services des SPE sont plus âgés que ceux nés aux États-Unis.<sup>16,17,22,26</sup> La plupart des parents ont rapporté avoir été aux prises avec des difficultés causées par leur faible maîtrise de la langue d'usage dans leur nouveau pays.<sup>25,27,32,33</sup> En ce qui concerne la structure familiale, la majorité des enfants immigrants ayant reçu les services des SPE vivent avec deux figures parentales (la plupart avec leurs parents biologiques), mariées ou conjoints de fait.<sup>14-18,22,31,32</sup>

Seulement six études ont investigué le lien unissant les caractéristiques parentales et la probabilité de maltraitance d'enfants. Ces études montrent que les familles immigrantes partagent plusieurs facteurs de risque avec les familles non-immigrantes. Le stress familial élevé est le facteur de risque rapporté comme ayant la plus grande influence sur le risque de maltraitance d'enfants, tant chez les familles immigrantes que les familles non-immigrantes.<sup>16-18,22</sup> Les autres facteurs de risque spécifiques aux familles immigrantes ayant reçu les services des SPE sont : vivre dans une famille reconstituée<sup>11</sup> ou monoparentale,<sup>11,20</sup> les familles avec un niveau de scolarité bas ou très bas, <sup>11,20</sup> les familles nombreuses<sup>20,26</sup> et finalement, l'expérience d'être témoin ou d'avoir été témoin de violence conjugale dirigée vers un donneur de soins.<sup>16,22</sup>

Par ailleurs, les études soulignent la présence de facteurs de risque liés aux défis associés à l'arrivée dans un nouveau pays. La sévérité des abus est inversement proportionnelle au temps passé dans le pays d'accueil :

plus d'années passées aux États-Unis étaient associées à des abus physiques moins sévères.<sup>21,31,32,34</sup> Cette donnée est expliquée par l'hypothèse du stress d'acculturation, qui suggère que les familles immigrantes peuvent présenter un risque plus élevé de maltraitance d'enfants lors des premières années de résidence dans le pays d'accueil en raison d'un stress d'acculturation élevé puisqu'elles sont moins familières avec les lois, les normes et les valeurs de leur société d'accueil.<sup>31</sup> Park relève une forte association entre de nombreux conflits familiaux causés par le stress d'acculturation et le risque d'abus physique envers les enfants.<sup>27</sup>

Les études confirment également que l'usage de discipline physique excessive<sup>18,22</sup> ainsi que la présence de croyances et pratiques cautionnant ces mesures disciplinaires constituent un facteur de risque supplémentaire.<sup>14-16,22,27,31,32</sup> Également, la probabilité d'exercer de la discipline physique par un parent se trouve augmentée lorsque le parent a lui-même été victime de maltraitance lorsqu'il était enfant.<sup>34</sup> Cependant, 38% des mères qui rapportaient ne pas avoir été victimes de maltraitance durant leur enfance ont tout de même eu recours à des punitions physiques envers leurs propres enfants.<sup>34</sup>

En ce qui concerne spécifiquement les parents réfugiés, deux études soulignent que les expériences traumatiques et les difficultés émotionnelles vécues dans leurs pays d'origine constituent des facteurs de risques pour la violence physique<sup>20</sup> et la négligence parentale.<sup>21</sup>

### Les facteurs de risque exosystemiques

Le statut légal d'immigration du parent, notamment celui de réfugié ou celui de sans-papiers, apparaît comme un facteur de risque récurrent quant à la maltraitance envers les enfants,<sup>11,19,20</sup> probablement à cause du haut niveau de stress vécu par le parent et la peur constante d'une potentielle séparation des membres de la famille.<sup>16,22</sup> À l'inverse, Dettlaff et ses collègues soulignent que le fait de ne pas posséder de papiers peut également avoir un effet dissuasif et ainsi réduire le risque de maltraitance chez les enfants en raison des conséquences potentielles, incluant notamment la déportation et donc, des séparations familiales.<sup>16,17</sup>

Neuf études relèvent la présence de difficultés financières chez les familles immigrantes où les enfants avaient été victimes de maltraitance. Dans trois études réalisées par Dettlaff et ses collègues, plus de 70% des parents avaient un revenu annuel familial en-dessous des 20 000\$; cette statistique est similaire aux familles non-immigrantes impliquées dans les SPE (60%).<sup>16-18</sup> Davantage de familles immigrantes ayant reçu les services des SPE n'avaient pas accès à l'assistance financière publique (63,9% vs

31,2%) ou aucune source de revenu (30% des parents dans l'étude de Rhee et al.)<sup>31</sup> L'association entre le revenu et la maltraitance d'enfants était cependant statistiquement significatif dans une seule étude.<sup>17</sup> Dans une étude réalisée en Alaska, le fait de recevoir une forme d'aide publique était significativement associé à la maltraitance d'enfants chez les individus nés à l'extérieur de l'Alaska.<sup>28</sup>

Les difficultés financières peuvent être associées au chômage.<sup>19,25</sup> Trois études rapportent un taux de chômage très élevé chez les parents immigrants (les indices de chômage varient de 48%,<sup>31</sup> 64%,<sup>14</sup> et 91% pour les mères et 86% pour les pères<sup>24</sup>). Les familles immigrantes peuvent aussi vivre des difficultés liées aux conditions de travail comme la perte d'emploi, la déqualification professionnelle ou de mauvaises conditions de travail.<sup>25</sup>

Finalement, six études ont rapporté que les familles immigrantes ayant reçu les services des SPE avaient un réseau de soutien social insuffisant ou inexistant.<sup>25,31</sup> Cependant, le lien entre l'isolement social et la maltraitance envers les enfants n'était pas significatif dans d'autres études.<sup>16-18,22</sup>

### **Les facteurs de protection spécifiques aux familles immigrantes ou réfugiées**

Très peu d'études se sont intéressées aux facteurs de protection contre la maltraitance des enfants chez les familles immigrantes ou réfugiées. Deux études montrent que le fait d'avoir une mère née à l'étranger était associé à un plus faible taux de maltraitance.<sup>12,30</sup> Quelques facteurs de protection supplémentaires incluaient : une faible consommation d'alcool chez les mères nées à l'étranger,<sup>12,24</sup> un niveau de scolarité plus élevé<sup>31</sup> et finalement le fait de vivre avec les deux parents.<sup>16,22</sup> L'effet bénéfique associé à ce dernier facteur est probablement la réduction du niveau de stress par la présence d'un conjoint et d'un statut financier moins précaire.<sup>16,22</sup> Finalement, vivre dans un quartier avec une densité plus élevée d'immigrants et une grande diversité ethnique s'avère être un facteur de protection. Ceci est observable en raison de la disponibilité des sources d'aide et d'un plus grand soutien social.<sup>17</sup> Les résultats peuvent cependant différer selon l'origine des familles. Ainsi, dans une étude réalisée dans l'état de Washington, ce facteur était protecteur pour les familles d'origine cambodgienne, sans toutefois l'être pour les familles vietnamiennes.<sup>34</sup>

## **DISCUSSION**

Dans cette revue systématique de la littérature nous avons examiné et évalué l'état des données existantes quant à la prévalence, ainsi que les facteurs de risque et de protection relatifs à la maltraitance des enfants chez les familles immigrantes et réfugiées. Ces données se sont avérées peu fiables et les résultats des études sont trop contradictoires pour être concluants. Il n'y a actuellement aucune donnée probante suggérant que les enfants immigrants et réfugiés sont plus à risque de subir des mauvais traitements. Ils semblent toutefois être surreprésentés dans les cas confirmés de violence physique des Services de Protection de l'Enfance. Cela peut effectivement être lié à des pratiques disciplinaires plus sévères présentes chez certaines familles immigrantes ou réfugiées. Toutefois, cette surreprésentation peut aussi être expliquée par d'autres facteurs tels que la pauvreté et ses risques associés, la discrimination structurelle, les biais des professionnels prenant les décisions, le manque de compétence culturelle et le manque de ressources appropriées.<sup>41</sup>

De plus, notre revue de littérature permet de conclure qu'il y a peu de données scientifiques disponibles quant aux facteurs de risque et de protection pour la maltraitance d'enfants chez les familles immigrantes et réfugiées et qu'elles sont peu fiables. Les données disponibles sont très hétérogènes, parfois contradictoires, avec des méthodologies et des instruments de mesures très variables, ce qui exclut toute possibilité d'une méta-analyse. Les 24 études sont très hétérogènes en termes de

procédure méthodologique, d'objectifs et de résultats mesurés. Certaines études utilisent des échantillons issus des bénéficiaires des SPE alors que d'autres sondent la population générale. La taille des échantillons demeure très variable et la plupart des études sont exploratoires ou descriptives. Les méthodes de collecte de données incluent l'analyse de dossiers, des questionnaires auto-administrés et des entretiens qualitatifs réalisés avec les parents, les enfants ou les travailleurs sociaux. Plusieurs études utilisent des instruments développés par les auteurs avec très peu d'informations sur le développement et les mesures de validation de ces instruments. Ceci rend donc difficile l'évaluation de la fiabilité des résultats obtenus.

En outre, l'absence actuelle d'un modèle conceptuel est un obstacle considérable à une intégration efficace des résultats de recherche sur les familles immigrantes et réfugiées. Il est impossible de se prononcer sur l'étiologie des différences rapportées relativement aux taux de maltraitance d'enfants. Ces différences relatives au risque de mauvais traitements pourraient être expliquées par des facteurs migratoires (ex. acclimatation à un nouveau milieu, les défis économiques, le statut de réfugié), par des facteurs sociaux (ex. les lois spécifiques à certains états ou certaines pratiques influençant le signalement et le suivi de cas), par des facteurs culturels (ex. les valeurs et les normes relatives à la discipline des enfants) ou par une interaction dynamique entre les trois. Afin de pallier à cette limite, nous proposons un cadre écosystémique conceptuel qui permet d'illustrer l'interaction dynamique entre les différents facteurs. Notre modèle prédictif, présenté dans la figure 1, intègre les données sur la maltraitance des enfants dans les familles immigrantes et réfugiées présentées dans cette revue systémique. Ce modèle permet également de maximiser le potentiel des nombreux facteurs de protection quant à la maltraitance d'enfants dans les familles immigrantes et réfugiées. Certaines variables demeurent spécifiques aux familles immigrantes et réfugiées, notamment le statut d'immigration, les traumatismes pré-migratoires ou les problèmes familiaux dus au stress d'acculturation. D'autres facteurs ne sont cependant pas spécifiques à ces populations, ce qui soulève l'importance de prendre le temps de réaliser des évaluations complètes auprès des familles afin de bien comprendre leurs expériences, difficultés et besoins spécifiques.

### **Le statut d'immigration**

Le statut d'immigration semble être le facteur de risque le plus important pour la maltraitance des enfants chez les familles immigrantes et réfugiées.<sup>19,20</sup> Les familles et les enfants réfugiés, les demandeurs d'asile, les sans-papiers et les mineurs non accompagnés peuvent constituer un groupe à risque, en raison de la précarité de leur statut et de la menace constante d'être découverts ou déportés.<sup>42</sup> Ces groupes sont également à risque puisqu'il peut exister d'autres facteurs de risque covariants tels qu'une probabilité plus élevée d'avoir survécu à des traumatismes, un risque plus élevé de vivre dans la pauvreté, l'isolement social, le chômage forcé, un manque d'informations concernant les lois du pays hôte, un manque d'accès aux services d'interprètes, un accès inéquitable aux services sociaux et de santé, un manque de possibilités pour le développement de relations de confiance dans un environnement relativement sûr<sup>42</sup> et finalement, des problèmes de santé mentale.<sup>43</sup>

Plusieurs études confirment que les statuts de réfugié et de demandeur d'asile politique influencent fortement le revenu disponible, les opportunités d'emplois et l'accès aux services de soutien.<sup>44</sup> Pour les familles immigrantes et réfugiées, les difficultés financières et l'isolement social constituent souvent les défis les plus importants à surmonter durant les premières années dans un nouveau pays. Pour soutenir la famille, les mères se trouvent parfois forcées d'intégrer le marché du travail, occupant des emplois à salaires modiques. Ceci a pour effet d'augmenter leurs nombreuses responsabilités et d'obliger les pères à accepter des responsabilités supplémentaires avec lesquelles ils peuvent être moins familiers telles que la garde des enfants et les travaux ménagers.<sup>45</sup> Le niveau de stress familial résultant peut être augmenté

dramatiquement, particulièrement lorsque les pères ont à composer avec le chômage ou doivent occuper un emploi qui ne correspond pas à leur niveau de scolarité. Les recherches réalisées chez des minorités ethniques indiquent par exemple que la probabilité de conflits familiaux et de violence conjugale se voit augmentée lorsque les mères se retrouvent sur le marché du travail en raison de chômage paternel.<sup>46</sup>

L'impact d'un statut migratoire précaire ou incertain, les difficultés financières associées et les effets de l'isolement social sur la santé mentale des parents sont des facteurs qui ont tendance à interagir avec les facteurs de stress liés à l'arrivée dans un nouveau pays et à l'adversité sociale telle que la discrimination. Ces facteurs peuvent tous contribuer à l'émergence de comportements abusifs chez des parents en raison de l'augmentation de niveau de stress familial et parental.<sup>21,23,47</sup> De plus, les immigrants nouvellement arrivés et les parents réfugiés peuvent manquer de ressources pour aider leurs enfants à faire face aux défis du système scolaire, de la criminalité, du racisme et de l'intolérance.<sup>33,48</sup> Okamura et al. soutiennent que la colère et l'impuissance causées par ces expériences peuvent être exprimées dans la famille par des pratiques disciplinaires plus sévères ou plus violentes.<sup>49</sup> Ces pratiques disciplinaires abusives sont souvent exercées dans le but de protéger les enfants des dangers de la société d'accueil tels que perçu par les parents. Ces dangers perçus peuvent notamment inclure la discrimination, les violences structurelles, les influences des gangs et de la drogue.<sup>33,50</sup>

### Le stress et les traumatismes

Les défis qui accompagnent le processus d'immigration et d'arrivée dans un nouveau pays d'accueil, comme l'acculturation et l'adaptation à une nouvelle culture, contribuent à créer des facteurs de risque familiaux spécifiques.<sup>17</sup> La peur de l'inconnu, le stress, la perte de systèmes de soutien déjà établis,<sup>25,51</sup> l'isolement social,<sup>21,25</sup> la diminution du statut socio-économique<sup>52</sup> et l'incertitude face à l'avenir sont souvent des sources de stress importantes chez les familles immigrantes et peuvent exercer une importante pression sur les parents. Les études révèlent également que les nouveaux immigrants et les réfugiés vivent davantage de traumatismes que les familles originaires du pays d'accueil et que les immigrants installés depuis plus longtemps.<sup>20,48</sup> Ces éléments peuvent expliquer pourquoi le stress familial a été identifié comme facteur de risque prévalent chez ces familles.<sup>17</sup>

Le risque de maltraitance envers les enfants au sein de familles immigrantes et réfugiées peut également être lié à des expériences de «re-traumatisation» pendant le processus de migration et d'établissement au pays d'accueil.<sup>20,53</sup> Certains auteurs rapportent que les moments de stress vécus durant le processus migratoire ainsi que le stress vécu après celui-ci, peuvent avoir un impact plus puissant que les épisodes de stress pré-migratoires.<sup>54</sup> Ces expériences de re-traumatisation incluent: les procédures judiciaires prolongées pour l'obtention ou la régulation du statut d'immigration, l'incertitude liée au statut de réfugié,<sup>55</sup> les logements insalubres, la discrimination et le chômage liés à l'attente des décisions des instances juridiques.<sup>56</sup>

### Acculturation et perturbations familiales

Les familles immigrantes et réfugiées vivent d'importantes perturbations dans leur vie familiale durant les premiers mois ou les premières années d'installation dans un nouveau pays. Ces perturbations peuvent créer plusieurs facteurs de stress qui auront pour effet de déstabiliser la famille nucléaire, les relations avec la famille élargie ainsi que la hiérarchie familiale. Ces perturbations peuvent venir remettre en question les fondements de l'unité familiale comme les rôles de genre et les rôles parent-enfant.<sup>33</sup> Il est reconnu par exemple que les enfants apprennent la langue du pays d'accueil et qu'ils s'intègrent à la culture bien plus rapidement que leurs parents. Pour cette raison, les enfants peuvent souvent être appelés à agir comme traducteurs, comme négociateurs et comme guides pour les parents dans la société hôte.<sup>57</sup> Ce faisant, les enfants gagnent un grand pouvoir et menacent l'autorité ainsi que la

position hiérarchique supérieure de leurs parents.<sup>57</sup> Ce nouveau rôle ne fait pas que menacer la position du parent comme «l'aîné à écouter»,<sup>33</sup> il crée aussi des situations dans lesquelles l'enfant sera informé de situations et faits qui auraient dû demeurer dans la sphère parentale. Également, l'écart d'acculturation entre les parents et leurs enfants peut conduire à une perte de contrôle des premiers sur les derniers. Une telle perte de contrôle peut augmenter les risques d'une utilisation de mesures disciplinaires rigides chez certains parents dans un effort de gérer certaines revendications faites par leurs enfants.<sup>17</sup>

## CONCLUSION

### Question clé 3 : Quelles sont les recommandations pour les recherches futures?

Nous recommandons que les recherches futures incorporent des éléments proposés par notre modèle. Il sera alors possible d'examiner son applicabilité et ses possibles améliorations dans le but de fournir une base pour l'évaluation des risques et la planification des interventions. Une piste d'amélioration du modèle serait d'intégrer des variables liées à l'exosystème et au macrosystème, absentes dans les études recensées. Plusieurs facteurs de risque pouvant augmenter la probabilité de maltraitance chez les familles immigrantes et réfugiées se trouvent par exemple dans la sphère législative, sociale et économique ainsi que dans des sphères plus vastes liées à des phénomènes tels que la mondialisation et les flux migratoires.<sup>17</sup> À titre d'exemple, les politiques publiques peuvent limiter l'accès des parents immigrants à la croissance socio-économique.<sup>25</sup> Ces politiques ont un impact direct sur la capacité des familles immigrantes à bien fonctionner dans leur nouvelle société d'accueil.<sup>16,17</sup> De nombreuses sociétés occidentales, comme le Canada et les États-Unis, ont instaurées des politiques qui ont entraîné une diminution du financement des services médicaux, des programmes sociaux et des organismes communautaires aux familles immigrantes vulnérables.<sup>17</sup> Or, nous n'avons trouvé aucune étude évaluant l'impact de ces facteurs sur le risque accru de mauvais traitements chez les familles immigrantes ou réfugiées. Toutefois, certains auteurs soulèvent des hypothèses quant à l'impact de ces politiques sur le risque de maltraitance, notamment par le biais des conséquences sur les conditions de vie des parents (telle la difficulté à intégrer le marché du travail et les autres conséquences énumérées plus haut).

Pour appliquer le modèle proposé, les futures études devront documenter le statut migratoire du parent ainsi que son lieu de naissance.<sup>22</sup> Elles devront aussi inclure de l'information sur les conditions pré-migratoires et le processus migratoire. Finalement, elles devront explorer les défis associés à l'installation dans un nouveau pays et faire l'évaluation des possibles expériences de re-traumatisation.<sup>20</sup> Le temps passé dans un nouveau pays ne devra pas servir de mesure d'approximation pour l'acculturation. De plus, les recherches futures gagneraient à installer des mesures de contrôle de l'impact possible des variables covariantes associées à l'immigration ou au statut de réfugié. Ces variables incluent par exemple, la déqualification professionnelle, un faible statut socio-économique et l'isolement social.

Notre modèle offre également l'avantage d'intégrer des variables dites «culturelles». Ceci est particulièrement pertinent dans le cas des familles immigrantes et réfugiées récemment installées puisqu'elles sont probablement moins acculturées que les minorités ethniques déjà établies au pays d'accueil. L'ajout de ces variables rend possible l'examen des pratiques et des modes d'adaptation telles qu'inscrites dans les traditions culturelles. Ceci est primordial puisque ces pratiques peuvent à la fois constituer des facteurs de risque et de protection pour développer le pouvoir d'agir des familles.

La maltraitance envers les enfants est un phénomène complexe et multidimensionnel résultant d'une interaction dynamique entre un ensemble de facteurs de risque et de protection. La majorité des études

**Figure 1.** Modèle écosystémique prédictif du risque de maltraitance chez les enfants de familles immigrantes et réfugiées

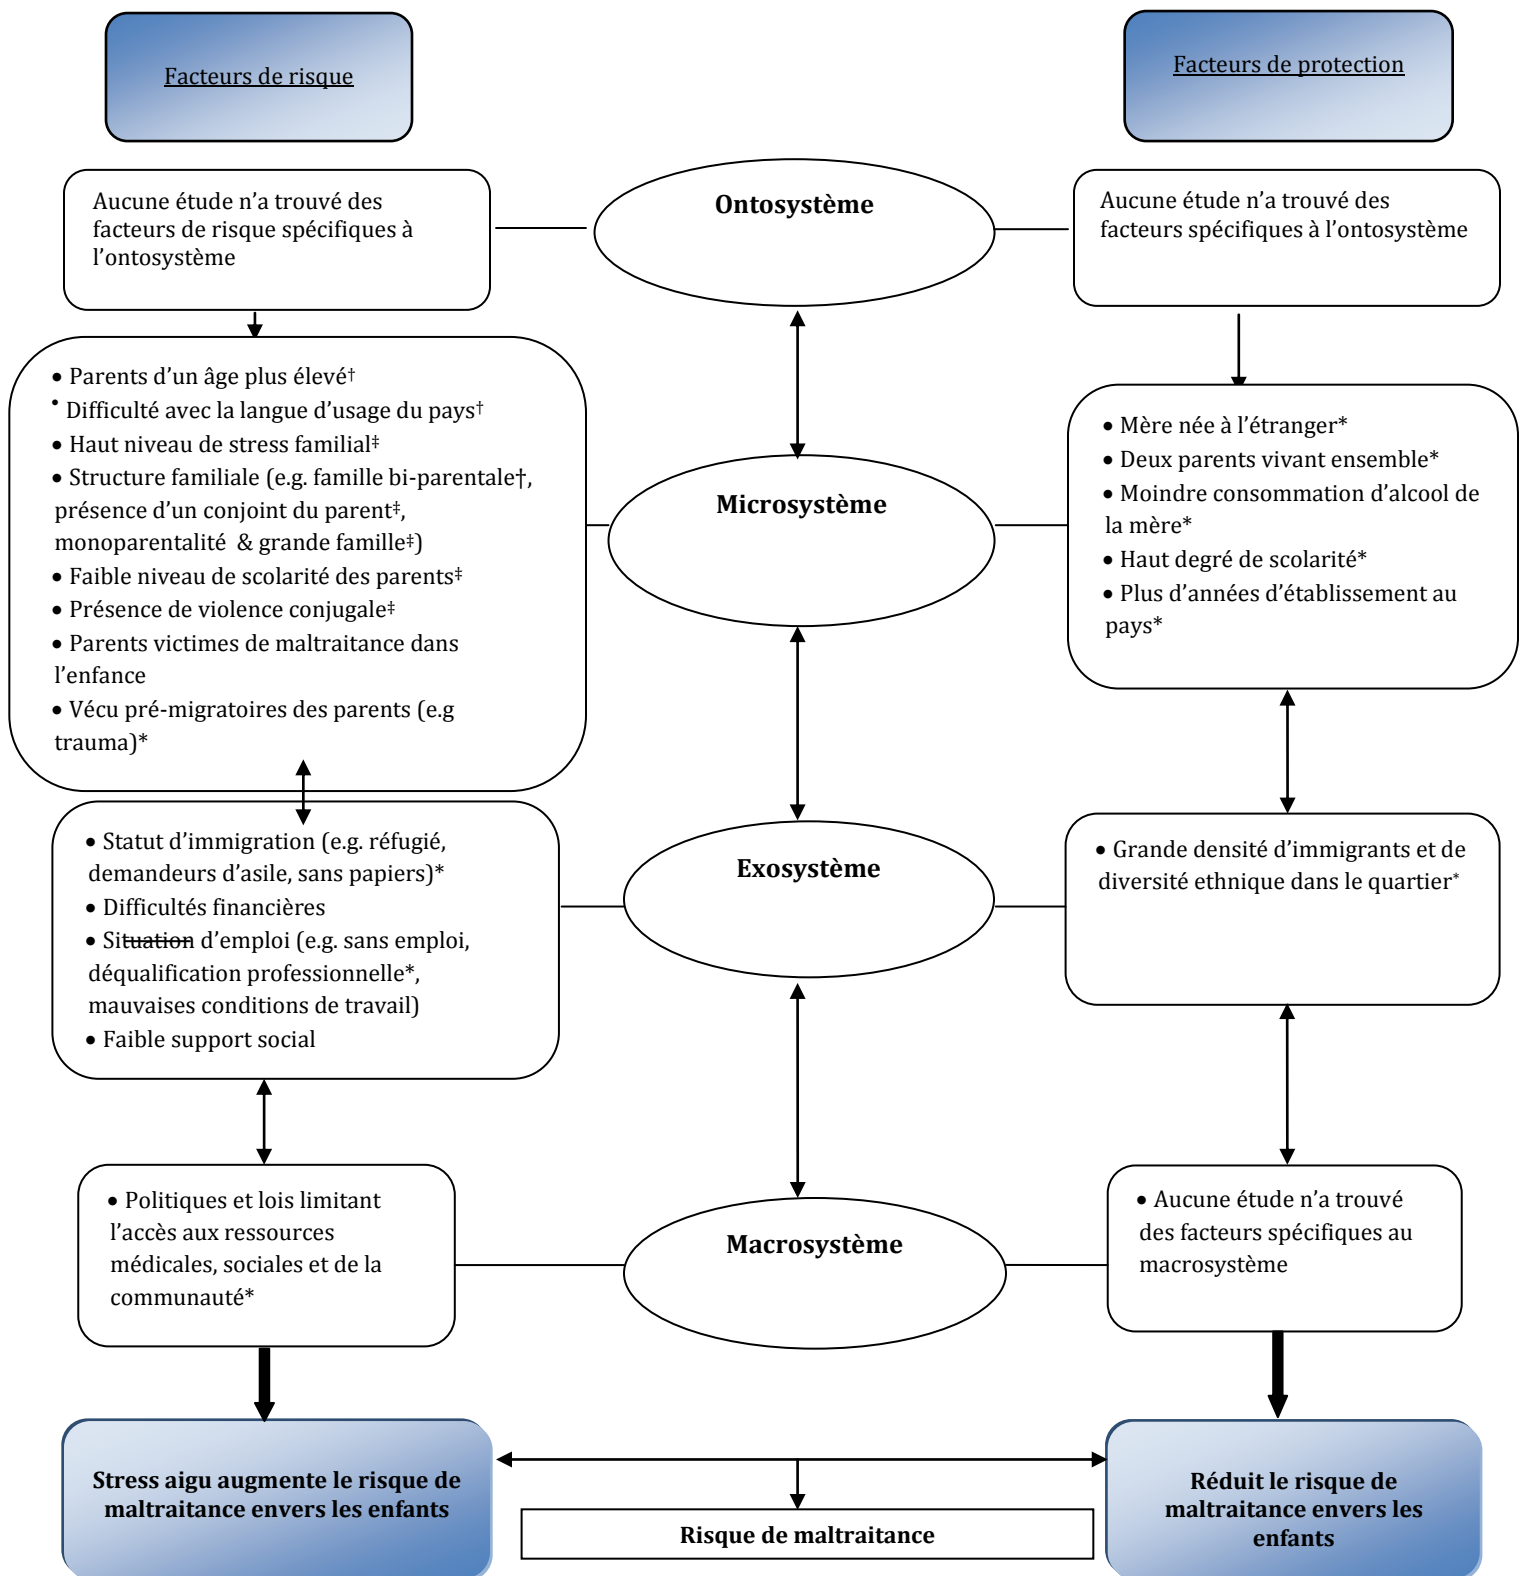

\* Facteurs spécifiques aux familles immigrantes et réfugiées; † Caractéristiques des parents (facteurs de risque potentiels);

‡ Facteurs de risque des six études spécifiques sur le sujet

recensées ont généralement examiné les facteurs de risque, n'accordant que très peu d'attention aux facteurs de protection ou encore à l'interaction entre ceux-ci. Dettlaff et ses collègues rappellent que les familles immigrantes possèdent des ressources et une résilience qui sont trop souvent négligées dans les études; ces omissions peuvent biaiser les résultats et les conclusions qui en sont tirées.<sup>16-18</sup> Les familles immigrantes sont à la recherche de meilleures conditions de vie pour leurs enfants. La motivation et l'espoir qu'elles cultivent peuvent s'avérer être des sources de résilience pour faire face aux difficultés à venir lors des processus migratoire et d'acculturation.<sup>16-18,22,25</sup> Enfin, les données issues de recherches quantitatives pourraient être enrichies avec des méthodes qualitatives (et vice versa) dans un effort de donner une voix aux populations habituellement peu écoutées. Ces ajouts méthodologiques pourraient également enrichir la compréhension des relations de pouvoir complexes entre les familles immigrantes et les diverses institutions impliquées dans les interventions spécialisées en maltraitance des enfants.

Finalement, le modèle écosystémique peut être utilisé pour guider l'adaptation des programmes d'intervention aux besoins et aux caractéristiques spécifiques des populations immigrantes et réfugiées à risque. Nous avons initialement inclus dans nos termes de recherche ceux portant sur les programmes d'intervention mais cette démarche n'a recensé que deux études supplémentaires. Il est donc nécessaire de mener davantage d'études évaluatives sur l'efficacité des programmes d'intervention pour les familles immigrantes et réfugiées à risque.

## RÉFÉRENCES

- Coluccci E, Hassan G. Prevention of domestic violence against women and children in low-income and middle-income countries. *Curr Opin Psychiatry* 2014;27(5):350-57. PMID: 25033276. doi: 10.1097/YCO.0000000000000088.
- Hassan G, Rousseau C, Thombs BD, Kirmayer L, Feightner J, Ueffing E et al. Child Maltreatment: Evidence-based clinical guidelines for immigrants and refugees. *CMAJ* 2011;183(12):Appendix 12.
- Pottie K, Greenaway C, Feightner J, Welch V, Swinkels H, Rashid M et al. Evidence-based clinical guidelines form immigrants and refugees. *CMAJ* 2011;183(12):e824-e925. PMID: 20530168. doi: 10.1503/cmaj.090313.
- Kirmayer LJ, Narasiah L, Munoz M, Rashid M, Ryder AG, Guzder J et al. Common mental health problems in immigrants and refugees: General approach in primary care. *CMAJ* 2011;183(12):e959-67. PMID: 20603342. doi: 10.1503/cmaj.090292.
- Tugwell P, Pottie K, Welch V, Ueffing E, Chambers A, Feightner J. Evaluation of evidence-based literature and formation of recommendations for the Clinical Preventive Guidelines for Immigrants and Refugees in Canada. *CMAJ* 2011; 183(12):e933-e938. PMID: 20573711. doi: 10.1503/cmaj.090289.
- AGREE Collaboration. Appraisal of Guidelines for Research & Evaluation (AGREE) Instrument. AGREE Collaboration, 2001. Available at: <http://apps.who.int/rhl/agreeinstrumentfinal.pdf> (Accessed February 16, 2015).
- Boivin M, Hassan G. Ethnic identity and psychological adjustment in transracial adoptees: A review of the literature. *Ethn Racial Stud* 2015;38(7):1084-1103. doi: 10.1080/01419870.2014.992922.
- Hassan G, Thombs BD, Rousseau C, Kirmayer LJ, Feightner J, Ueffing E et al. Intimate partner violence: Evidence review for newly arriving immigrants and refugees. *CMAJ* 2011;183(12):Appendix 13.
- Pottie K, Dahal G, Georgiades C, Premji K, Hassan G. Do first generation immigrant adolescents face higher rates of bullying, violence and suicidal behaviours than do third generation and native born? *J Immigr Minor Health* 2015;17(5):1557-66. PMID: 25248622. doi: 10.1007/s10903-014-0108-6.
- Moher D, Liberati A, Tetzlaff J, Altman DG, PRISMA Group. Preferred reporting items for systematic reviews and meta-analyses: The PRISMA statement. *PLoS Med* 2009;6:e1000097. PMID: 19621072. doi: 10.1371/journal.pmed.1000097.
- Alink LRA, Euser S, van Ijzendoorn MH, Bakermans-Kranenburg MJ. Is elevated risk of child maltreatment in immigrant families associated with socioeconomic status? Evidence from three sources. *Int J Psychol* 2013;48(2):117-27. PMID: 23597011. doi: 10.1080/00207594.2012.734622.
- Altschul I, Lee SJ. Direct and mediated effects of nativity and others indicators of acculturation on Hispanic mothers' use of physical aggression. *Child Maltreat* 2011;16(4):262-74. PMID: 21926114. doi: 10.1177/1077559511421523.
- Bo Vatnar SK, Bjorkly S. An interactional perspective on the relationship of immigration to intimate partner violence in a representative sample of help-seeking women. *J Interpers Violence* 2010;25(10):1815-35. PMID: 20040712. doi: 10.1177/0886260509354511.
- Chang J, Rhee S, Berthold SM. Child abuse and neglect in Cambodian refugee families: Characteristics and implications for practice. *Child Welfare* 2008;87(1):141-60. PMID: 18575261.
- Chang J, Rhee S, Weaver D. Characteristics of child abuse in immigrant Korean families and correlates of placement decisions. *Child Abuse Negl* 2006;30(8):881-91. PMID: 16939691. doi: 10.1016/j.chiabu.2006.03.002.

- Dettlaff AJ, Earner I. Children of immigrants in the child welfare system: Characteristics, risk, and maltreatment. *Fam Soc* 2012;93(4):295-303.
- Dettlaff AJ, Earner I, Philipps SD. Latino children of immigrants in the child welfare system: Prevalence, characteristics, and risk. *Child Youth Serv Rev* 2009;31(7):775-83. doi: 10.1016/j.chiayouth.2009.02.004.
- Dettlaff AJ, Johnson MA. Child maltreatment dynamics among immigrant and U.S. born Latino children: Findings from the National Survey of Child and Adolescent Well-being (NSCAW). *Child Youth Serv Rev* 2011;33(6):936-44. doi: 10.1016/j.chiayouth.2010.12.017.
- Euser S, Alink LRA, Pannebakker F, Vogels T, Bakermans-Kranenburg MJ, Van Ijzendoorn MH. The prevalence of child maltreatment in the Netherlands across a 5-year period. *Child Abuse Negl* 2013;37(10):841-51. PMID: 23938018. doi: 10.1016/j.chiabu.2013.07.004.
- Euser EM, van Ijzendoorn MH, Prinzie P, Bakermans-Kranenburg MJ. Elevated child maltreatment rates in immigrant families and the role of socioeconomic differences. *Child Maltreat* 2011;16(1):63-73. PMID: 21041234. doi: 10.1177/1077559510385842.
- Ima K, Hohm CF. Child maltreatment among Asian and Pacific Islander refugees and immigrants: The San Diego case. *J Interpers Violence* 1991;6(3):267-85. doi: 10.1177/088626091006003001.
- Johnson-Motoyama M, Dettlaff AJ, Finno M. Parental nativity and the decision to substantiate: Findings from a study of Latino children in the second National Survey of Child and Adolescent Well-being (NSCAW II). *Child Youth Serv Rev* 2012;34(11):229-39. doi: 10.1016/j.chiayouth.2012.07.017.
- Lau AS, Takeuchi DT, Alegria M. Parent-to-Child aggression among Asian American parents: Culture, context, and vulnerability. *J Marriage Fam* 2006;68(5):1261-75. doi: 10.1111/j.1741-3737.2006.00327.x.
- Lindell C, Svedin CG. Social services provided for physically abused children in Sweden: Background factors and interventions. *Int J Soc Welf* 2004;13(4):340-49. doi: 10.1111/j.1468-2397.2004.00330.x.
- Maiter S, Stalker CA, Alaggia R. The experiences of minority immigrant families receiving child welfare services: Seeking to understand how to reduce risk and increase protective factors. *Fam Soc* 2009;90(1):28-36. doi: 10.1606/1044-3894.3842.
- Osterling KL, Han M. Reunification outcomes among Mexican immigrant families in the child welfare system. *Child Youth Serv Rev* 2011;33(9):1658-66. doi: 10.1016/j.chiayouth.2011.04.020.
- Park MS. The factors of child physical abuse in Korean immigrant families. *Child Abuse Negl* 2001;25(7):945-58. PMID: 11523870. doi: 10.1016/S0145-2134(01)00248-4.
- Parrish JW, Young MB, Perham-Hester KA, Gessner BD. Identifying risk factors for child maltreatment in Alaska: A population-based approach. *Am J Prev Med* 2011;40(6):666-73. PMID: 21565660. doi: 10.1016/j.amepre.2011.02.022.
- Putnam-Hornstein E, Needell B, King B, Johnson-Motoyama M. Racial and ethnic disparities: A population-based examination of risk factors for involvement with child protective services. *Child Abuse Negl* 2013;37(1):33-46. PMID: 23317921. doi: 10.1016/j.chiabu.2012.08.005.
- Putnam-Hornstein E, Needell B. Predictors of child protective service contact between birth and age five: An examination of California's 2002 birth cohort. *Children Youth Serv Rev* 2011;33(11):2400-07. doi: 10.1016/j.chiayouth.2011.07.010.
- Rhee S, Chang J, Berthold SM, Mar G. Child maltreatment among immigrant Vietnamese families: Characteristics and implications for practice. *Child Adolesc Social Work J* 2012;29(2):85-101. doi: 10.1007/s10560-011-0253-x.
- Rhee S, Chang J, Weaver D, Wong D. Child maltreatment among immigrant Chinese families: Characteristics and patterns of placement. *Child Maltreat* 2008;13(3):269-79. PMID: 18359957. doi: 10.1177/1077559507313461.
- Segal UA. Exploring child abuse among Vietnamese refugees. *J Multicult Soc Work* 2000;8(3-4):159-91. doi: 10.1300/J285v08n03\_01.
- Tajima EA, Harachi TW. Parenting beliefs and physical discipline practices among Southeast Asian immigrants: Parenting in the context of cultural adaptation to the United States. *J Cross Cult Psychol* 2010;41(2):212-35. doi: 10.1177/0022022109354469.
- Garbarino J. The human ecology of child maltreatment: A conceptual model for research. *J Marriage Fam* 1977;39(4):721-35. doi: 10.2307/350477.
- Belsky J. Child maltreatment: An ecological integration. *Am Psychol* 1980;35(4):320-35. PMID: 7386966. doi: 10.1037/0003-066X.35.4.320.
- Cicchetti D, Lynch M. Toward an ecological/transactional model of community violence and child maltreatment: Consequences for children's development. *Psychiatry* 1993;56(1):96-118. PMID: 8488217. doi: 10.1521/00332747.1993.11024624.
- Bronfenbrenner U. Toward an experimental ecology of human development. *Am Psychol* 1977;32(7):513-31. doi: 10.1037/0003-066X.32.7.513.
- Bronfenbrenner U. *The ecology of human development*. Cambridge, MA: Harvard University Press, 1979.
- Belsky J. Etiology of child maltreatment: A developmental-ecological analysis. *Psychol Bull* 1993;114(3):413-34. PMID: 8272464. doi: 10.1037/0033-2909.114.3.413.
- Dufour S, Hassan G, Laverne C. Mauvais traitements et diversité culturelle: bilan des connaissances et implications pour la pratique. In: Gagné MH, Drapeau S, Saint-Jacques MC (Eds.), *Les enfants maltraités: de l'affliction à l'espoir. Pistes de compréhension et d'action*. Québec, QC: Presses de l'Université Laval, 2012; 143-71.
- Lay M. Papadopoulos I. Sexual maltreatment of unaccompanied asylum-seeking minors from the Horn of Africa: A mixed method study focusing on vulnerability and prevention. *Child Abuse Negl* 2009;33(10):728-38. PMID: 19819018. doi: 10.1016/j.chiabu.2009.05.003.

43. Okitikpi T, Aymer C. Social work with African refugee children and their families. *Child Fam Soc Work* 2003;8(3):213-22. doi: 10.1046/j.1365-2206.2003.00286.x.
44. Bernard C, Gupta A. Black African children and the child protection system. *Br J Soc Work* 2008;38(3),476-92. doi: 10.1093/bjsw/bcl370.
45. Coltrane S, Parke RD, Adams M. Complexity of father involvement in low-income Mexican American families. *Fam Relat* 2004;53(2):179-89. doi: 10.1111/j.0022-2445.2004.00008.x.
46. Aldarondo E, Kantor GK, Jasinski JL. A risk marker analysis of wife assault in Latino families. *Violence Against Women* 2002;8(4):429-54. doi: 10.1177/107780120200800403.
47. Maiter S, Alaggia R, Trocmé, N. Perceptions of child maltreatment by parents from the Indian subcontinent: Challenging myths about culturally based abusive parenting practices. *Child Maltreat* 2004;9(3):309-24. PMID: 15245683. doi: 10.1177/1077559504266800
48. Bean T, Derluyn I, Eurelings-Bontekoe L, Broekaert E, Spinhoven P. Comparing psychological distress, traumatic stress reactions, and experiences of unaccompanied refugee minors with experiences of adolescents accompanied by parents. *J Nerv Ment Dis* 2007;195(4):288-97. PMID: 17435478. doi: 10.1097/01.nmd.0000243751.49499.93
49. Okamura A, Heras P, Wong-Kerberg, L. Asian, Pacific Island, and Filipino Americans and sexual child abuse. In: Fontes LA (Ed.), *Sexual abuse in nine North American cultures: Treatment and Prevention*. Thousand Oaks, CA, US: Sage Publications, Inc; 1995; 67-96.
50. Ahn HN. Cultural diversity and the definition of child abuse. In: Barth RP, Berrick JD, Gilbert N (Eds.), *Child welfare research review, Vol 1*. New York, NY: Columbia University Press, 1994; 28-59.
51. Finno M, Vidal de Haymes M, Mindell R. Risk of affective disorders in the migration and acculturation experience of Mexican migrants. *Prot Child* 2006;21(2):22-35.
52. Sledjeski EM, Dierker LC, Bird HR, Canino G. Predicting child maltreatment among Puerto Rican children from migrant and non-migrant families. *Child Abuse Negl* 2009;33(6):382-92. PMID: 19457554. doi: 10.1016/j.chiabu.2008.11.004.
53. Solis J. Re-thinking illegality as a violence against, not by Mexican immigrants, children, and youth. *J Soc Issues* 2003;59(1):15-31. doi: 10.1111/1540-4560.00002.
54. Liebkind K. Acculturation and stress. Vietnamese refugees in Finland. *J Cross Cult Psychol* 1996;27(2):161-80. doi: 10.1177/0022022196272002.
55. Van der Veer G. Counselling & therapy with refugees and victims of torture. London: Wiley, 1998.
56. Wiese EPB, Burhorst I. The mental health of asylum seeking and refugee children and adolescents attending a clinic in the Netherlands. *Transcult Psychiatry* 2007;44(4):596-613. PMID: 18089641. doi: 10.1177/1363461507083900.
57. Furuto SM, Murase K. Asian Americans in the future. In: Furuto SM, Biswas R, Chung DK, Murase K, Ross-Sheriff F (Eds.), *Social work practice with Asian Americans*. Newbury Park, CA: Sage Publications, 1992; 240-53.

## ABSTRACT

**OBJECTIVES:** Study results on child maltreatment based on general population samples cannot be extrapolated with confidence to vulnerable immigrant or refugee families because of the specific characteristics and needs of these families. The aims of this paper are 1) to conduct an evidence review of the prevalence, risk factors and protective factors for child maltreatment in immigrant and refugee populations, and 2) to integrate the evidence in an analytical ecosystemic framework that would guide future research.

**METHODS:** We used a 14-step process based on guidelines from Preferred Reporting Items for Systematic Reviews and Meta-Analyses and the Canadian Collaboration for Immigrant and Refugee Health. We searched major databases from “the oldest date available to July 2014”. The eligibility criteria for paper selection included qualitative or quantitative methodologies; papers written in English or French; papers that describe, assess or review prevalence, risk and protection factors for child maltreatment; and a studied population of immigrants or refugees.

**SYNTHESIS:** Twenty-four articles met the criteria for eligibility. The results do not provide evidence that immigrant or refugee children are at higher risk of child maltreatment. However, recently settled immigrants and refugees experience specific risk factors related to their immigration status and to the challenges of settlement in a new country, which may result in high risk of maltreatment.

**CONCLUSION:** Future research must incorporate more immigrant and refugee samples as well as examine, within an ecosystemic framework, the interaction between migratory and cultural factors with regard to the prevalence, consequences and treatment of child maltreatment for the targeted groups.

**KEY WORDS:** Review; child maltreatment; immigrants; refugees; risk factors; ecosystemic model
